# Supplementary material for: Bio-inspired polypyrrole nanowire arrays on melamine foam with high-performance photo/electro-thermal conversion for all-weather cleanup of crude oil
Source: Royal Society of Chemistry journal article supplement (doi:10.1039/d4ta09132a), 2025-01-01
Supplement: d4ta09132a4.pdf [file d4ta09132a4.pdf]

## Supplementary Material

### **Bio-inspired polypyrrole nanowire arrays on melamine foam with high-performance photo/electro-thermal conversion for all-weather cleanup of crude oil**

*Qin Wang, Yu-long Liu, Zi-jie Huang, Zi-cheng Tang, De-xiang Sun, Jing-hui Yang,*

*Xiao-dong Qi\*, Yong Wang\**

Q. Wang, Y. Liu, Z. Huang, Z. Tang, D. Sun, J. Yang, X. Qi, Y. Wang

School of Chemistry, Key Laboratory of Advanced Technologies of Materials (Ministry of Education), Southwest Jiaotong University, Chengdu, 610031, China.

E-mail: [qxdjianhu@163.com](mailto:qxdjianhu@163.com) (Xiao-dong Qi); [yongwang1976@swjtu.edu.cn](mailto:yongwang1976@swjtu.edu.cn) (Y. Wang)

## List of Figures:

**Figure S1.** The SEM image and EDS of the MF with gold layer.

**Figure S2.** SEM images of MF@PPy foams at different polymerization times. (a) 0.5 h, (b) 1 h, (c) 2 h, and (d) 3h.

**Figure S3.** The SEM image of (a) MF@PPy-3, (b) MF@PPy-3/PDMS and (c) the cross-section of MF@PPy-3/PDMS.

**Figure S4.** The WCA of MF@PPy-3/PDMS.

**Figure S5.** (a) TGA and (b) DTG curves of the MF and MF@PPy/PDMS foams.

**Figure S6.** The long-term stability of Joule heating performance of MF@PPy/PDMS foams.

**Figure S7.** Photographs and SEM images of the MF@PPy/PDMS foam in its original (a, b) and compressed (c, d) states.

**Video S1.** The continuous oil absorption process of MF@PPy/PDMS under simulated illumination (1 sunlight).

**Video S2.** The continuous oil absorption process of MF@PPy/PDMS under a power (2 V).

**Video S3.** The dynamic cleaning up oil process of MF@PPy-3/PDMS foam under NIR laser irradiation.

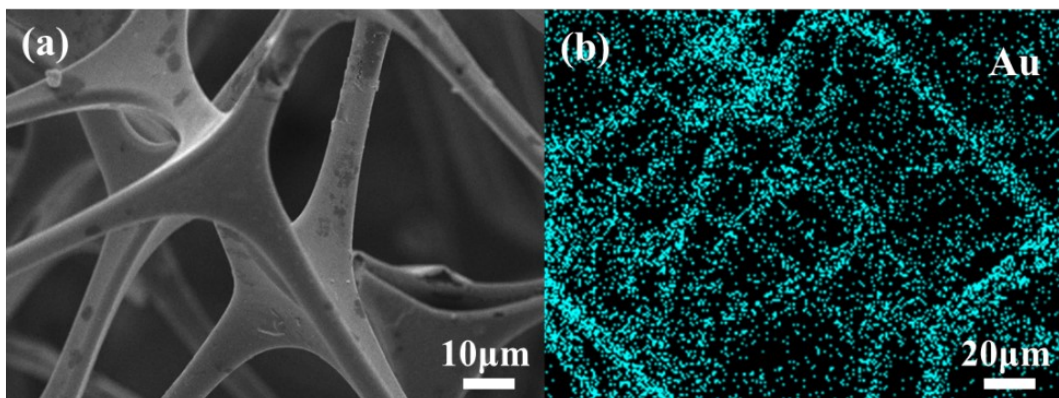

**Figure S1.** The SEM image and EDS of the MF with gold layer.

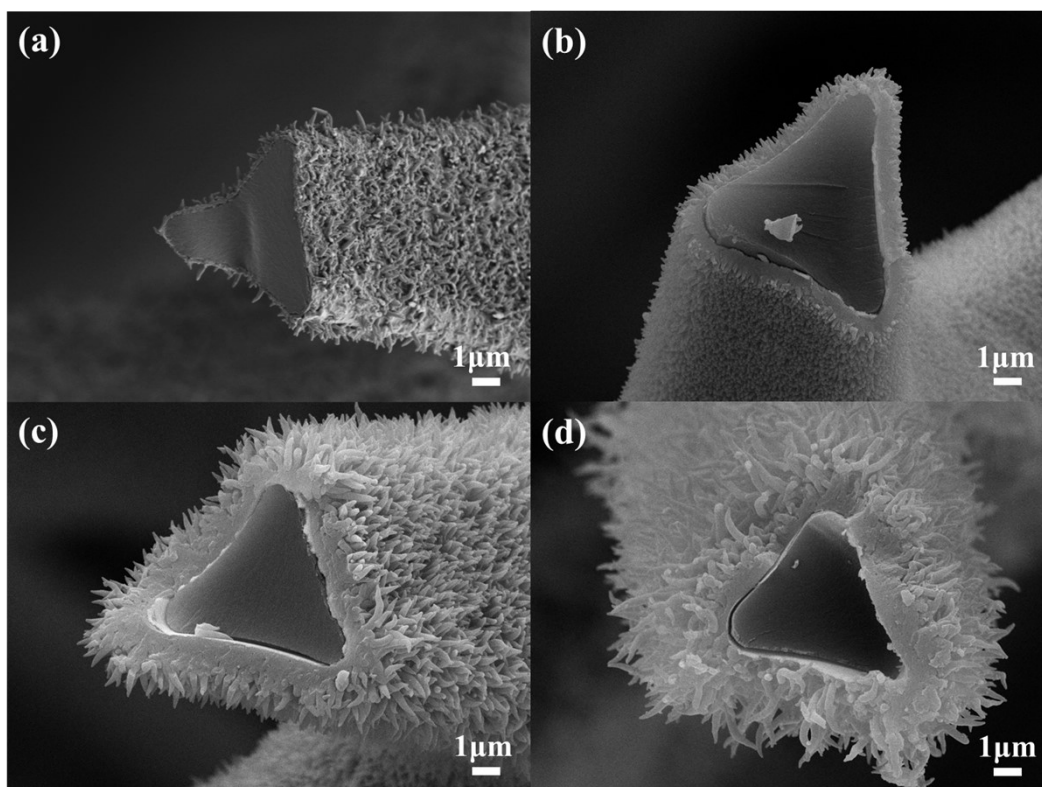

**Figure S2.** SEM images of MF@PPy foams at different polymerization times. (a) 0.5 h, (b) 1 h, (c) 2 h, and (d) 3h.

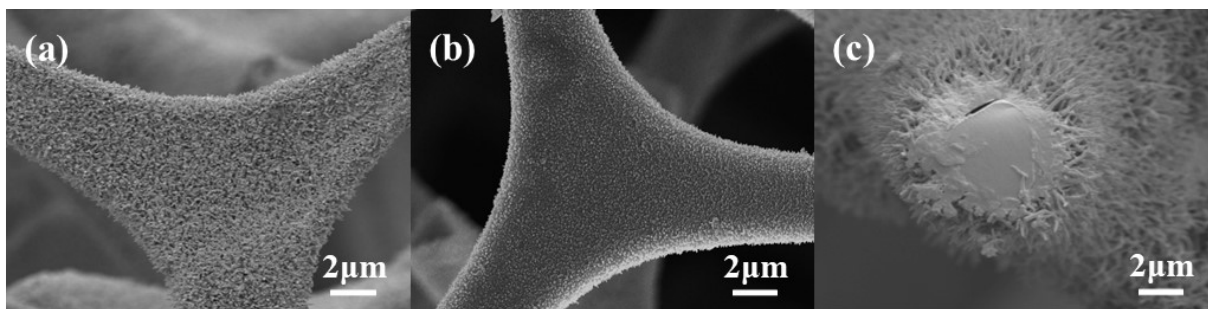

**Figure S3.** The SEM image of (a) MF@PPy-3, (b) MF@PPy-3/PDMS and (c) the cross-section of MF@PPy-3/PDMS.

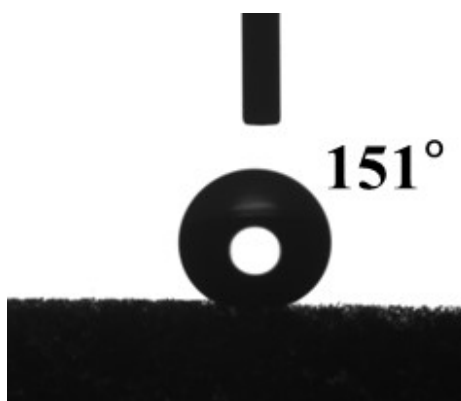

**Figure S4.** The WCA of MF@PPy-3/PDMS.

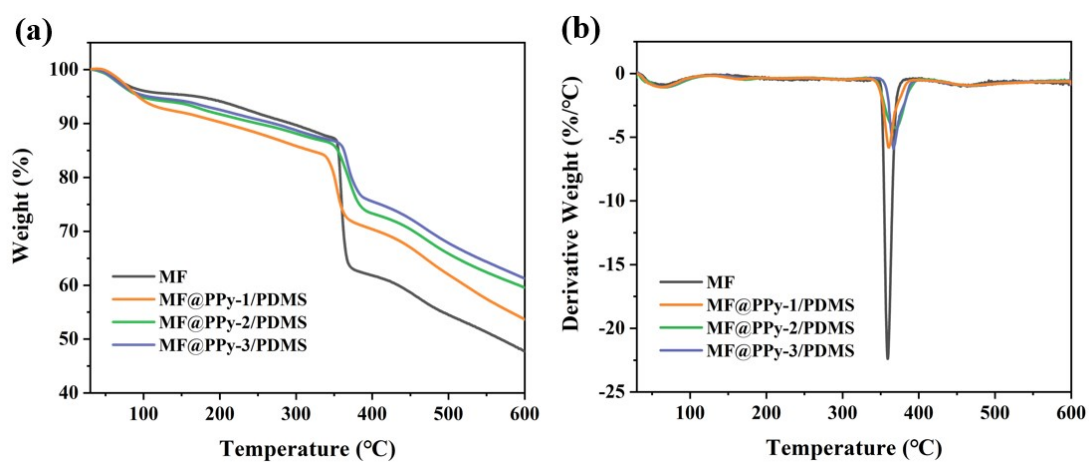

**Figure S5.** (a) TGA and (b) DTG curves of the MF and MF@PPy/PDMS foams.

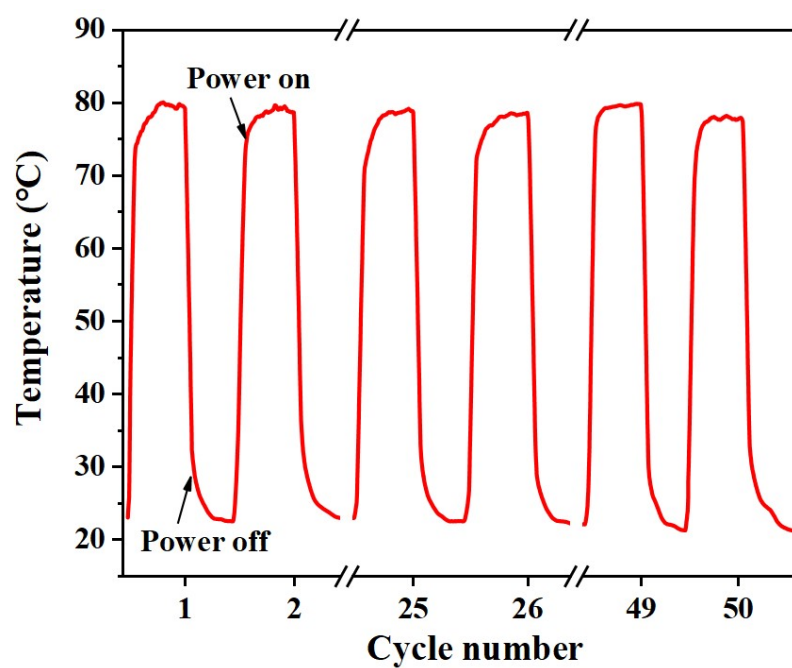

**Figure S6.** The long-term stability of Joule heating performance of MF@PPy/PDMS foams.

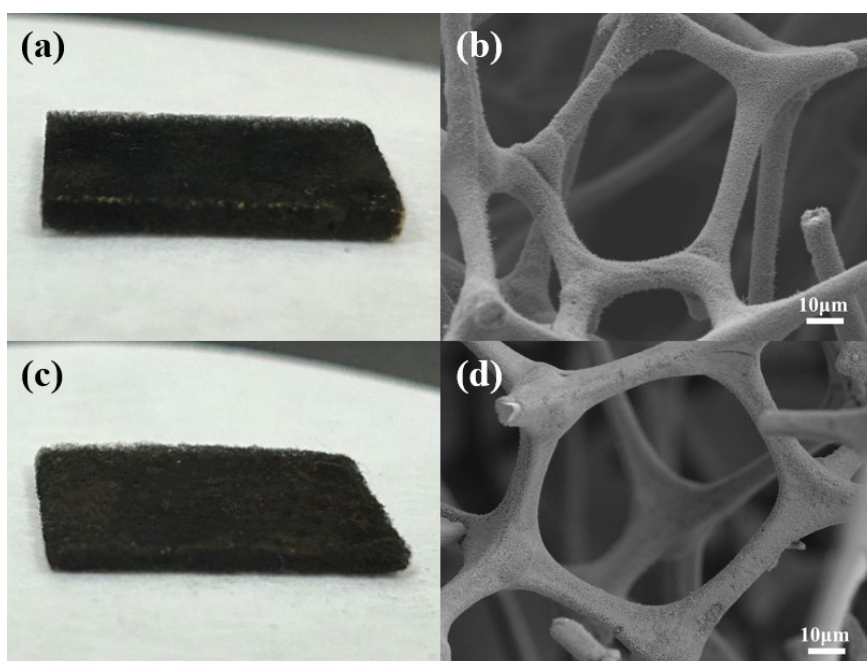

**Figure S7.** Photographs and SEM images of the MF@PPy/PDMS foam in its original (a, b) and compressed (c, d) states.
